# Supplementary material for: Women Taking a Folic Acid Supplement in Countries with Mandatory Food Fortification Programs May Be Exceeding the Upper Tolerable Limit of Folic Acid: A Systematic Review
Source: MDPI journal article supplement (doi:10.3390/nu14132715), 2022-06-29
Supplement: s1 [file s1]

Table S1. Quality assessment of studies.

| Study Name                | 1. Introduction - aims/objectives clear? | 2. Methods - study design appropriate? | 3. Sample size justified? | 4. Target/reference pop. clearly defined? | 5. Sample frame appropriate ? | 6. Was the selection process appropriate? | 7. Non responders categorised? | 8. Risk factors/outcomes appropriate to the aims? | 9. Risk factors measured correctly? | 10. SI and/or precision estimates? | 11. Methods described for repetition? | 12. Basic data adequately described? | 13. Response rate & non-response bias? | 14. Non-responders described? | 15. Were the results internally consistent? | 16. Results presented for all the analyses? | 17. Discussions conclusions justified by | 18. Limitations ? | 19. Funding sources/ conflicts? | 20. Ethical approval/consent? |
|---------------------------|------------------------------------------|----------------------------------------|---------------------------|-------------------------------------------|-------------------------------|-------------------------------------------|--------------------------------|---------------------------------------------------|-------------------------------------|------------------------------------|---------------------------------------|--------------------------------------|----------------------------------------|-------------------------------|---------------------------------------------|---------------------------------------------|------------------------------------------|-------------------|---------------------------------|-------------------------------|
| Yang 2007                 | Yes                                      | Yes                                    | Yes                       | Yes                                       | Yes                           | Yes                                       | Yes                            | Yes                                               | Yes                                 | Yes                                | Yes                                   | Yes                                  | No                                     | UN                            | UN                                          | Yes                                         | Yes                                      | Yes               | No                              | Yes                           |
| Whitrow 2009              | Yes                                      | Yes                                    | UN                        | Yes                                       | Yes                           | Yes                                       | Yes                            | Yes                                               | Yes                                 | Yes                                | Yes                                   | Yes                                  | No                                     | Yes                           | Yes                                         | Yes                                         | Yes                                      | Yes               | UN                              | Yes                           |
| Trivedi 2018              | Yes                                      | Yes                                    | UN                        | Yes                                       | Yes                           | Yes                                       | UN                             | Yes                                               | Yes                                 | Yes                                | Yes                                   | Yes                                  | No                                     | UN                            | Yes                                         | Yes                                         | Yes                                      | Yes               | No                              | Yes                           |
| Tinker 2012 (obesity)     | Yes                                      | Yes                                    | Yes                       | Yes                                       | Yes                           | Yes                                       | Yes                            | Yes                                               | Yes                                 | UN                                 | Yes                                   | Yes                                  | No                                     | UN                            | Yes                                         | Yes                                         | Yes                                      | Yes               | UN                              | Yes                           |
| Tinker 2012               | Yes                                      | Yes                                    | Yes                       | Yes                                       | Yes                           | Yes                                       | UN                             | Yes                                               | Yes                                 | UN                                 | Yes                                   | No                                   | No                                     | UN                            | Yes                                         | No                                          | Yes                                      | Yes               | No                              | Yes                           |
| Sotres-Alvarez 2013       | Yes                                      | Yes                                    | UN                        | Yes                                       | Yes                           | Yes                                       | UN                             | Yes                                               | Yes                                 | Yes                                | Yes                                   | Yes                                  | UN                                     | UN                            | Yes                                         | Yes                                         | Yes                                      | Yes               | No                              | Yes                           |
| Shin 2016                 | Yes                                      | Yes                                    | Yes                       | Yes                                       | Yes                           | Yes                                       | Yes                            | Yes                                               | Yes                                 | Yes                                | Yes                                   | Yes                                  | No                                     | Yes                           | Yes                                         | Yes                                         | Yes                                      | Yes               | No                              | Yes                           |
| Roy 2012                  | Yes                                      | Yes                                    | UN                        | Yes                                       | Yes                           | Yes                                       | Yes                            | Yes                                               | Yes                                 | Yes                                | Yes                                   |                                      | No                                     | UN                            | Yes                                         | Yes                                         | Yes                                      | Yes               | No                              | Yes                           |
| Rai 2015                  | Yes                                      | Yes                                    | Yes                       | Yes                                       | Yes                           | Yes                                       | Yes                            | Yes                                               | Yes                                 | Yes                                | Yes                                   | No                                   | No                                     | UN                            | UN                                          | Yes                                         | Yes                                      | Yes               | No                              | Yes                           |
| Plumptre 2015             | Yes                                      | Yes                                    | Yes                       | Yes                                       | Yes                           | Yes                                       | Yes                            | Yes                                               | Yes                                 |                                    | Yes                                   | Yes                                  | No                                     | Yes                           | Yes                                         | Yes                                         | Yes                                      | Yes               | No                              | Yes                           |
| Pick 2005                 | Yes                                      | Yes                                    | UN                        | Yes                                       | Yes                           | Yes                                       | Yes                            | Yes                                               | Yes                                 | Yes                                | Yes                                   | Yes                                  | No                                     | UN                            | Yes                                         | Yes                                         | Yes                                      | Yes               | No                              | Yes                           |
| Murphy 2021- Impact       | Yes                                      | Yes                                    | UN                        | Yes                                       | Yes                           | Yes                                       | Yes                            | Yes                                               | Yes                                 | Yes                                | Yes                                   | Yes                                  | No                                     | UN                            | Yes                                         | Yes                                         | Yes                                      | Yes               | No                              | Yes                           |
| Murphy 2021 - Gestational | Yes                                      | Yes                                    | UN                        | Yes                                       | Yes                           | Yes                                       | UN                             | Yes                                               | Yes                                 | UN                                 | Yes                                   | Yes                                  | No                                     | UN                            | Yes                                         | Yes                                         | Yes                                      | Yes               | No                              | Yes                           |
| Mojtabai 2004             | Yes                                      | Yes                                    | Yes                       | Yes                                       | Yes                           | Yes                                       | Yes                            | Yes                                               | Yes                                 | Yes                                | Yes                                   | Yes                                  | UN                                     | UN                            | Yes                                         | Yes                                         | Yes                                      | Yes               | UN                              | Yes                           |
| Masih 2015                | Yes                                      | Yes                                    | Yes                       | Yes                                       | Yes                           | Yes                                       | Yes                            | Yes                                               | Yes                                 | Yes                                | Yes                                   | Yes                                  | No                                     | Yes                           | Yes                                         | Yes                                         | Yes                                      | Yes               | No                              | Yes                           |
| Martinussen 2012          | Yes                                      | Yes                                    | UN                        | Yes                                       | Yes                           | Yes                                       | Yes                            | Yes                                               | Yes                                 | Yes                                | Yes                                   | Yes                                  | No                                     | UN                            | Yes                                         | Yes                                         | Yes                                      | Yes               | No                              | Yes                           |
| Marchetta 2016            | Yes                                      | Yes                                    | Yes                       | Yes                                       | Yes                           | Yes                                       | Yes                            | Yes                                               | Yes                                 | Yes                                | Yes                                   | Yes                                  | No                                     | UN                            | Yes                                         | Yes                                         | Yes                                      | Yes               | No                              | Yes                           |
| Livock 2017               | Yes                                      | Yes                                    | Yes                       | Yes                                       | Yes                           | Yes                                       | Yes                            | Yes                                               | Yes                                 | Yes                                | Yes                                   | UN                                   | No                                     | Yes                           | Yes                                         | Yes                                         | Yes                                      | Yes               | No                              | Yes                           |
| Jun-20                    | Yes                                      | Yes                                    | Yes                       | Yes                                       | Yes                           | Yes                                       | UN                             | Yes                                               | Yes                                 | Yes                                | Yes                                   | Yes                                  | UN                                     | UN                            | Yes                                         | Yes                                         | Yes                                      | Yes               | No                              | Yes                           |
| Hure 2009                 | Yes                                      | Yes                                    | Yes                       | Yes                                       | Yes                           | Yes                                       | UN                             | Yes                                               | Yes                                 |                                    | Yes                                   | Yes                                  | UN                                     | UN                            | Yes                                         | Yes                                         | Yes                                      | Yes               | No                              | Yes                           |

|                    |     |     |     |     |     |     |     |     |     |     |     |     |     |     |     |     |     |     |     |     |     |
|--------------------|-----|-----|-----|-----|-----|-----|-----|-----|-----|-----|-----|-----|-----|-----|-----|-----|-----|-----|-----|-----|-----|
| Hromi-Fiedler 2012 | Yes | Yes | UN  | Yes | Yes | Yes | UN  | Yes | Yes | Yes | Yes | Yes | Yes | UN  | No  | Yes | Yes | Yes | Yes | No  | Yes |
| Hamner 2013        | Yes | UN  | Yes | Yes | Yes | Yes | Yes | No  | Yes |
| Gomez 2015         | Yes | UN  | No  | Yes | Yes | Yes | Yes | No  | Yes |
| Gaskins 2012       | Yes | Yes | UN  | Yes | No  | UN  | UN  | Yes | Yes | Yes | No  | Yes |
| Gaskins 2019       | Yes | Yes | UN  | Yes | Yes | Yes | UN  | Yes | Yes | Yes | Yes | Yes | Yes | UN  | UN  | Yes | Yes | Yes | Yes | No  | Yes |
| Gaskins 2014       | Yes | Yes | UN  | Yes | Yes | Yes | UN  | Yes | Yes | UN  | No  | Yes | UN  | UN  | Yes | Yes | Yes | Yes | Yes | No  | Yes |
| Furness 2013       | Yes | Yes | Yes | Yes | Yes | Yes | UN  | Yes | Yes | Yes | Yes | Yes | Yes | No  | UN  | Yes | Yes | Yes | Yes | No  | Yes |
| Dubois 2017        | Yes | UN  | Yes | Yes | Yes | Yes | No  | Yes |
| Dorise 2020        | Yes | Yes | Yes | Yes | Yes | Yes | UN  | Yes | Yes | Yes | Yes | Yes | Yes | No  | No  | Yes | Yes | Yes | Yes | No  | Yes |
| Dietrich 2005      | Yes | No  | Yes | No  | Yes | Yes | Yes | Yes | Yes | Yes | UN  | Yes |
| Crider 2018        | Yes | No  | Yes | Yes | Yes | Yes | Yes | No  | Yes |
| Cena 2008          | Yes | Yes | No  | Yes | Yes | Yes | No  | Yes | Yes | Yes | Yes | Yes | Yes | No  | No  | Yes | Yes | Yes | Yes | No  | Yes |
| Boeke 2013         | Yes | Yes | UN  | Yes | Yes | Yes | No  | Yes | Yes | Yes | Yes | Yes | Yes | No  | Yes | Yes | Yes | Yes | Yes | UN  | Yes |
| Beringer 2021      | Yes | Yes | UN  | Yes | Yes | Yes | UN  | Yes | Yes | No  | Yes | Yes | Yes | UN  | UN  | Yes | Yes | Yes | Yes | No  | Yes |
| Bailey 2019        | Yes | Yes | Yes | Yes | Yes | Yes | UN  | Yes | Yes | Yes | Yes | Yes | Yes | UN  | UN  | Yes | Yes | Yes | Yes | Yes | Yes |
| French 2003        | Yes | Yes | No  | Yes | UN  | No  | Yes | Yes | Yes | UN  | No  | Yes |

Legend: UN=unknown, SI= statistical significance
