# Supplementary material for: Women Taking a Folic Acid Supplement in Countries with Mandatory Food Fortification Programs May Be Exceeding the Upper Tolerable Limit of Folic Acid: A Systematic Review
Source: MDPI journal article supplement (doi:10.3390/nu14132715), 2022-06-29
Supplement: s1 [file s1]



[My Account](#)





[Help](#)

[Feedback](#)

Logged in as Carolyn Ledowsky

[Logoff](#)

Search

Journals

Books

Multimedia

My Workspace

EBP Tools

What's New

[My Projects](#)

|

[My Searches & Alerts](#)

|

[My eTocs](#)

Send us your feedback

Permanent Searches 6

PERMANENT SEARCHES 6

☐ Favorites Only

| Run | Copy | Delete |
|-----|------|--------|
|-----|------|--------|

☐ Folate intake - intake with supps

Permanent

Or

☒ Medline OVID finaL\_ 71021

Permanent

Countries, population (not humans, not adults, not female)folate, intake (food fortification etc)

1. Andorra/
2. "Antigua and Barbuda"/
3. Aruba/
4. Australia/
5. Austria/
6. Bahamas/
7. Bahrain/
8. Barbados/
9. Belgium/
10. Bermuda/
11. British Virgin Islands/
12. Brunei/
13. Canada/
14. West Indies/
15. Channel Islands/
16. Chile/
17. Croatia/
18. Curacao/
19. Cyprus/
20. Czech Republic/
21. Denmark/
22. Estonia/
23. Faroe Islands.mp.
24. Finland/
25. France/
26. Polynesia/
27. Germany/
28. Gibraltar/
29. Greece/
30. Greenland/
31. Guam/
32. Hong Kong/
33. Hungary/
34. Iceland/
35. Ireland/
36. United Kingdom/
37. Israel/
38. Italy/

39. Japan/
40. "Republic of Korea"/
41. Kuwait/
42. Latvia/
43. Liechtenstein/
44. Lithuania/
45. Luxembourg/
46. Macau/
47. Malta/
48. Monaco/
49. Micronesia/
50. Netherlands/
51. New Caledonia/
52. New Zealand/
53. Micronesia/
54. Norway/
55. Oman/
56. Palau/
57. Poland/
58. Portugal/
59. Puerto Rico/
60. Qatar/
61. San Marino/
62. Saudi Arabia/
63. Seychelles/
64. Singapore/
65. Sint Maarten/
66. Slovakia/
67. Slovenia/
68. Spain/
69. "Saint Kitts and Nevis"/
70. st martin.mp.
71. Sweden/
72. Switzerland/
73. (trinidad and tobago).mp. [mp=title, abstract, original title, name of substance word, subject heading word, floating sub-heading word, keyword heading word, organism supplementary concept word, protocol supplementary concept word, rare disease supplementary concept word, unique identifier, synonyms]
74. (turks and caicos islands).mp. [mp=title, abstract, original title, name of substance word, subject heading word, floating sub-heading word, keyword heading word, organism supplementary concept word, protocol supplementary concept word, rare disease supplementary concept word, unique identifier, synonyms]
75. United Arab Emirates/
76. United States/
77. Uruguay/
78. United States Virgin Islands/
79. 1 or 2 or 3 or 4 or 5 or 6 or 7 or 8 or 9 or 10 or 11 or 12 or 13 or 14 or 15 or 16 or 17 or 18 or 19 or 20 or 21 or 22 or 23 or 24 or 25 or 26 or 27 or 28 or 29 or 30 or 31 or 32 or 33 or 34 or 35 or 36 or 37 or 38 or 39 or 40 or 41 or 42 or 43 or 44 or 45 or 46 or 47 or 48 or 49 or 50 or 51 or 52 or 53 or 54 or 55 or 56 or 57 or 58 or 59 or 60 or 61 or 62 or 63 or 64 or 65 or 66 or 67 or 68 or 69 or 70 or 71 or 72 or 73 or 74 or 75 or 76 or 77 or 78
80. Pregnancy/
81. Preconception Care/
82. periconceptional.mp.
83. pre pregnancy.mp.
84. Prenatal Care/
85. Perinatal Care/
86. Pregnant Women/
87. Folic Acid/
88. folvite.mp.
89. pteroglutamic acid.mp.
90. vitamin B9.mp.
91. vitamin M.mp.
92. unmetabolised folic acid.mp.
93. unmetabolized folic acid.mp.
94. folate.mp.
95. Food, Fortified/
96. food supplemented.mp.
97. Dietary Supplements/
98. Biofortification/
99. food supplements.mp.
100. Food Assistance/
101. Nutrition Surveys/

|      |                                                        |
|------|--------------------------------------------------------|
| 102. | Health Surveys/                                        |
| 103. | prenatal supplement.mp.                                |
| 104. | 80 or 81 or 82 or 83 or 84 or 85 or 86                 |
| 105. | 87 or 88 or 89 or 90 or 91 or 92 or 93 or 94           |
| 106. | 95 or 96 or 97 or 98 or 99 or 100 or 101 or 102 or 103 |
| 107. | 79 and 104 and 105 and 106                             |
| 108. | limit 107 to yr="1998 -Current"                        |

☐ **Revised folate intake OR** Permanent
